# Supplementary material for: Nitrogen isotope evidence for Earth’s heterogeneous accretion of volatiles
Source: PubMed Central journal article supplement (PMC9378614; doi:10.1038/s41467-022-32516-5), 2022-08-15
Supplement: 41467_2022_32516_MOESM1_ESM.pdf [file 41467_2022_32516_MOESM1_ESM.pdf]

---

**Supplementary Information for**  
**Nitrogen isotope evidence for Earth's heterogeneous accretion**  
**of volatiles**

Lanlan Shi<sup>1,2,3#</sup>, Wenhua Lu<sup>1,2,3#</sup>, Takanori Kagoshima<sup>4</sup>, Yuji Sano<sup>4,5</sup>, Zenghao Gao<sup>1,2,3</sup>,  
Zhixue Du<sup>1,2</sup>, Yun Liu<sup>6</sup>, Yingwei Fei<sup>7</sup>, Yuan Li<sup>1,2\*</sup>

<sup>1</sup>State Key Laboratory of Isotope Geochemistry, Guangzhou Institute of  
Geochemistry, Chinese Academy of Sciences, Guangzhou 510640, China

<sup>2</sup>CAS Center for Excellence in Deep Earth Science, Guangzhou 510640, China

<sup>3</sup>College of Earth and Planetary Sciences, University of Chinese Academy of  
Sciences, Beijing 100049, China

<sup>4</sup>Division of Ocean-Earth System Science, Atmosphere and Ocean Research Institute,  
University of Tokyo, Kashiwa, Chiba 277-8564, Japan

<sup>5</sup>Center for Advanced Marine Core Research, Kochi University, Nanokoku, Kochi  
783-8502, Japan.

<sup>6</sup>International Center for Planetary Science, College of Earth Sciences, Chengdu  
University of Technology, Chengdu 610059, China

<sup>7</sup>Earth and Planets Laboratory, Carnegie Institution for Science, Washington DC  
20015, USA

#These authors contributed equally.

\*Corresponding author. E-mail address: Yuan.Li@gig.ac.cn

**This PDF file includes:**

- 1. Supplementary Figs. 1–14**
- 2. Supplementary Note 1. The references cited for the  $\delta^{15}\text{N}$  data plotted in Fig. 1.**
- 3. Supplementary references**

---

**1. Supplementary Figs. 1–14:**



**Supplementary Figure 1. Reflected-light photomicrographs of typical run products synthesized in graphite-lined Pt<sub>95</sub>Rh<sub>05</sub> or graphite capsules.** **a** Coexisting metallic melt and silicate melt synthesized at 1.5 GPa and 1700 °C using silicate MORB (run N-1) in a graphite-lined Pt<sub>95</sub>Rh<sub>05</sub> capsule. The silicate melt was quenched into glass. **b** Close-up view of the quenched metallic melt in (a). **c, d** The separated metallic melt and silicate melt from run PY-2 synthesized at 8 GPa and 2000 °C using silicate pyrolite in a graphite capsule. The pyrolite melt had a typical dendritic quench texture.



**Supplementary Figure 2. Typical Raman spectral of silicate glasses from this study showing regions associated with N-C-H-O volatile species.** Note that the water peak intensity increases with increasing the amount of  $\text{Mg}(\text{OH})_2$  added in the starting silicate. The experiments (N-1, N-6, and N-7; Supplementary Data 2) were synthesized at 1.5 GPa and 1700 °C, and  $f\text{O}_2$  of  $\sim\text{IW}-0.5$ . These observed N-C-H-O species are consistent with those observed in previous studies<sup>1-4</sup>, including the one that determined the metal/silicate N-isotopic fractionations<sup>5</sup>.



**Supplementary Figure 3.** **a** Comparison of the experimentally determined  $D_N^{metal/silicate}$  with the calculated  $D_N^{metal/silicate}$  using Eq. (1) in the main text. **b** The plot of activity coefficient of N in the metallic melt as a function of oxygen fugacity ( $\Delta IW$ ). Note the non-ideal interaction of C and N.



**Supplementary Figure 4. Weak correlations occur between sample  $fO_2$ , the light element and Ni content in metallic melt, and the metallic melt  $\delta^{15}N$ .** **a** The Ni + Si + S content in the metallic melt is in a weak negative correlation with  $fO_2$ . **b** The Ni + Si + S content in the metallic melt is in a weak positive correlation with  $\delta^{15}N$  of the metallic melt.



**Supplementary Figure 5. The negative correlation between  $\Delta^{15}N^{\text{metal-silicate}}$  and the fraction of N losing during the experiment.** The data were taken from Dalou et al.<sup>5</sup>. The large  $\Delta^{15}N^{\text{metal-silicate}}$  values are likely caused by kinetic processes, rather than representing equilibrium N-isotopic fractionations. See main text for more detailed explanations.



**Supplementary Figure 6.** The metal/silicate N-isotopic fractionation ( $\Delta^{15}N_{\text{metal-silicate}}$ ) as a function of experimental duration. The independence of  $\Delta^{15}N_{\text{metal-silicate}}$  on the experimental duration indicates that 60 mins was sufficient for approaching equilibrium at 1700 °C.



**Supplementary Figure 7. Modeling N-isotopic composition of Earth’s core and mantle assuming that Earth accreted its 100% mass through the collisions of differentiated impactors that have a  $\delta^{15}\text{N}$  value of  $-30\text{‰}$ .** The results show that core-formation alone cannot lead to a  $\delta^{15}\text{N}$  value of  $-5\text{‰}$  of Earth’s present-day mantle from a starting  $\delta^{15}\text{N}$  value of  $-30\text{‰}$ .



**Supplementary Figure 8. The N-content and  $\delta^{15}\text{N}$  of the proto-Earth's atmosphere and mantle as a function of mass accreted based on a combined model of Earth's accretion and differentiation<sup>6,7</sup>.** **a, b** The N-content of the proto-Earth's atmosphere and mantle. The N-content of the atmosphere is relative (normalized) to the mass of the silicate Earth. **c, d** The  $\delta^{15}\text{N}$  of the proto-Earth's atmosphere and mantle. This figure shows the effect of varying the mass percentage ( $\Phi=20\text{--}60\%$ ) of the silicate magma ocean that is in equilibrium with the overlying atmosphere on the N-content and -isotopic composition of the proto-Earth's atmosphere and mantle. The degree of impact-induced atmosphere loss was fixed at 45% throughout all accretion stages.



**Supplementary Figure 9. The N-content and  $\delta^{15}\text{N}$  of the proto-Earth's atmosphere and silicate mantle as a function of mass accreted. a, b** The N-content of the proto-Earth's atmosphere and mantle. The N-content of the atmosphere is relative (normalized) to the mass of the silicate Earth. **c, d** The  $\delta^{15}\text{N}$  of the proto-Earth's atmosphere and mantle. This figure shows that constant impact-induced atmosphere loss (varying from 40% to 60%) in each impact only affects the N-content and -isotopic composition of the atmosphere, without affecting those of the mantle.  $\Phi$  was fixed at 20% throughout all accretion stages. Note that the case of varying the degree of atmosphere loss (deep brown curves), as presented in Fig. 4 in the main text, was also plotted for comparison.



**Supplementary Figure 10. Modeling results of the case with 60% impact-induced atmosphere loss (bule curve in Supplementary Fig. 9) after changing  $\Phi$  from 20% to 30% and the mass of last added CI chondritic materials from 0.04% to 0.025%. a, b** This figure shows that the low atmosphere N content and high atmosphere  $\delta^{15}\text{N}$ , caused by a high degree of impact-induced atmosphere loss as modeled in Supplementary Fig. 9 using  $\Phi$  of 20%, can be increased and decreased, respectively, by changing the other parameters used in the model. The N-content of the atmosphere is relative (normalized) to the mass of the silicate Earth.



**Supplementary Figure 11. The N-content and  $\delta^{15}\text{N}$  of the proto-Earth's atmosphere, mantle, and core as a function of mass accreted. a, b** This figure provides supplementary information to Fig. 4 in the main text, and shows that varying the timing of the delivery of CI chondrite-like materials would not change significantly the N-content and -isotopic composition of the proto-Earth's core, silicate mantle, and atmosphere. The N-content of the atmosphere is relative (normalized) to the mass of the silicate Earth.



**Supplementary Figure 12. The N-content and  $\delta^{15}\text{N}$  of the proto-Earth's atmosphere (Atm.), silicate mantle (Man.), and core as a function of mass accreted.** **a, b** This figure provides supplementary information to Fig. 4 in the main text, and shows that varying the C-content, from 0.5 to 2 wt.%, in Earth's core would not change significantly the N-content and -isotopic composition of the proto-Earth's atmosphere, silicate mantle, and core. The N-content of the atmosphere is relative (normalized) to the mass of the silicate Earth.



**Supplementary Figure 13. Effect of varying the  $\delta^{15}\text{N}$  of the Moon-forming giant impactor on the  $\delta^{15}\text{N}$  of the proto-Earth's atmosphere, mantle, and core at the end of accretion.** This figure shows a limited effect of the Moon-forming giant impactor on the proto-Earth  $\delta^{15}\text{N}$ .



**Supplementary Figure 14. The N-content and  $\delta^{15}\text{N}$  of the proto-Earth's atmosphere (Atm.), silicate mantle (Man.), and core as a function of mass accreted.** **a, b** This figure shows that the N-content in the impactors varying from 20 to 100 ppm or from 80 to 200 ppm could also explain the N-content and  $\delta^{15}\text{N}$  of the proto-Earth's atmosphere and silicate mantle by slightly modifying the mass of CI-chondritic materials delivered, but the N-content in Earth's core increases clearly with increasing the impactor N content. The N-content of the atmosphere is relative (normalized) to the mass of the silicate Earth.

## 2. Supplementary Note 1. The references cited for the $\delta^{15}\text{N}$ data plotted in Fig. 1.

In Fig. 1, we used ref. <sup>8</sup> for Earth's mantle, refs. <sup>9-11</sup> for mantle peridotite diamonds, ref. <sup>12</sup> for solar wind (SW), ref. <sup>13</sup> for comets, refs. <sup>14-19</sup> for OIB, refs. <sup>8,20</sup> for average  $\delta^{15}\text{N}$  values of modern and Archean sediments and Earth's crust, refs. <sup>21,22</sup> for enstatite chondrites (EC), and refs. <sup>23-33</sup> for the  $\delta^{15}\text{N}$  values of OC, CI, CM, CR, CV, and CO chondrites.

## 3. Supplementary references:

- 1 Armstrong, L. S., Hirschmann, M. M., Stanley, B. D., Falksen, E. G. & Jacobsen, S. D. Speciation and solubility of reduced C–O–H–N volatiles in mafic melt: Implications for volcanism, atmospheric evolution, and deep volatile cycles in the terrestrial planets. *Geochimica et Cosmochimica Acta* **171**, 283-302, doi:10.1016/j.gca.2015.07.007 (2015).
- 2 Kadik, A. A. *et al.* Solution behavior of reduced N–H–O volatiles in FeO–Na<sub>2</sub>O–SiO<sub>2</sub>–Al<sub>2</sub>O<sub>3</sub> melt equilibrated with molten Fe alloy at high pressure and temperature. *Phys Earth Planet In* **214**, 14-24, doi:10.1016/j.pepi.2012.10.013 (2013).
- 3 Li, Y., Huang, R., Wiedenbeck, M. & Keppler, H. Nitrogen distribution between aqueous fluids and silicate melts. *Earth and Planetary Science Letters* **411**, 218-228 (2015).
- 4 Grewal, D. S., Dasgupta, R. & Farnell, A. The speciation of carbon, nitrogen, and water in magma oceans and its effect on volatile partitioning between major reservoirs of the Solar System rocky bodies. *Geochimica et Cosmochimica Acta* **280**, 281-301, doi:10.1016/j.gca.2020.04.023 (2020).
- 5 Dalou, C. *et al.* Redox control on nitrogen isotope fractionation during planetary core formation. *Proc Natl Acad Sci U S A* **116**, 14485-14494, doi:10.1073/pnas.1820719116 (2019).
- 6 Rubie, D. C. *et al.* Heterogeneous accretion, composition and core–mantle differentiation of the Earth. *Earth and Planetary Science Letters* **301**, 31-42, doi:10.1016/j.epsl.2010.11.030 (2011).
- 7 Rubie, D. C. *et al.* Accretion and differentiation of the terrestrial planets with implications for the compositions of early-formed Solar System bodies and accretion of water. *Icarus* **248**, 89-108, doi:10.1016/j.icarus.2014.10.015 (2015).
- 8 Cartigny, P. & Marty, B. Nitrogen Isotopes and Mantle Geodynamics: The Emergence of Life and the Atmosphere-Crust-Mantle Connection. *Elements* **9**, 359-366 (2013).
- 9 Palot, M., Cartigny, P., Harris, J. W., Kaminsky, F. V. & Stachel, T. Evidence for deep mantle convection and primordial heterogeneity from nitrogen and carbon stable isotopes in diamond. *Earth and Planetary Science Letters* **357-358**, 179-193, doi:10.1016/j.epsl.2012.09.015 (2012).
- 10 Cartigny, P., Boyed, S. R., Harris, J. W. & Javoy, M. Nitrogen isotopes in peridotitic diamonds from Fuxian, China: the mantle signature. *Terra Nova*, 175-179 (1997).
- 11 Cartigny, P. *et al.* A mantle origin for Paleoproterozoic peridotitic diamonds from the Panda kimberlite, Slave Craton: Evidence from <sup>13</sup>C-, <sup>15</sup>N- and <sup>33</sup>S-,<sup>34</sup>S-stable isotope systematics. *Lithos* **112**, 852-864, doi:<https://doi.org/10.1016/j.lithos.2009.06.007> (2009).
- 12 Marty, B., Chaussidon, M., Wiens, R., Jurewicz, A. & Burnett, D. A <sup>15</sup>N-poor isotopic composition for the solar system as shown by Genesis solar wind samples. *Science* **332**, 1533-1536 (2011).
- 13 Marty, B. *et al.* Origins of volatile elements (H, C, N, noble gases) on Earth and Mars in light of recent results from the ROSETTA cometary mission. *Earth and Planetary Science Letters* **441**, 91-102, doi:10.1016/j.epsl.2016.02.031 (2016).
- 14 Labidi, J. *et al.* Hydrothermal (<sup>15</sup>N/<sup>14</sup>N) abundances constrain the origins of mantle nitrogen. *Nature* **580**, 367-371, doi:10.1038/s41586-020-2173-4 (2020).

- 
- 15 Marty, B. & Dauphas, N. The nitrogen record of crust–mantle interaction and mantle convection from Archean to Present. *Earth and Planetary Science Letters* **206**, 397-410, doi:10.1016/s0012-821x(02)01108-1 (2003).
  - 16 Barry, P. H., Hilton, D. R., Halldórsson, S. A., Hahm, D. & Marti, K. High precision nitrogen isotope measurements in oceanic basalts using a static triple collection noble gas mass spectrometer. *Geochemistry, Geophysics, Geosystems* **13**, doi:10.1029/2011gc003878 (2012).
  - 17 Halldórsson, S. A., Hilton, D. R., Barry, P. H., Füre, E. & Grönvold, K. Recycling of crustal material by the Iceland mantle plume: New evidence from nitrogen elemental and isotope systematics of subglacial basalts. *Geochimica et Cosmochimica Acta* **176**, 206-226, doi:10.1016/j.gca.2015.12.021 (2016).
  - 18 Mohapatra, R. K., Harrison, D., Ott, U., Gilmour, J. D. & Trierloff, M. Noble gas and nitrogen isotopic components in Oceanic Island Basalts. *Chemical Geology* **266**, 29-37, doi:<https://doi.org/10.1016/j.chemgeo.2009.03.022> (2009).
  - 19 Marty, B. & Humbert, F. Nitrogen and argon isotopes in oceanic basalts. *Earth and Planetary Science Letters* **152**, 101-112 (1997).
  - 20 Thomazo, C. & Papineau, D. J. E. Biogeochemical cycling of nitrogen on the early Earth. *Elements* **9**, 345-351 (2013).
  - 21 Grady, M. M., Wright, I., Carr, L. & Pillinger, C. Compositional differences in enstatite chondrites based on carbon and nitrogen stable isotope measurements. *Geochimica et Cosmochimica Acta* **50**, 2799-2813 (1986).
  - 22 Thiemens, M. H. & Clayton, R. N. Nitrogen contents and isotopic ratios of clasts from the enstatite chondrite Abeo. *Earth and Planetary Science Letters* **62**, 165-168, doi:[https://doi.org/10.1016/0012-821X\(83\)90080-8](https://doi.org/10.1016/0012-821X(83)90080-8) (1983).
  - 23 Alexander, C. M. *et al.* The provenances of asteroids, and their contributions to the volatile inventories of the terrestrial planets. *Science* **337**, 721-723, doi:10.1126/science.1223474 (2012).
  - 24 Hashizume, K. & Sugiura, N. Nitrogen isotopes in bulk ordinary chondrites. *Geochimica et Cosmochimica Acta* **59**, 4057-4069, doi:[https://doi.org/10.1016/0016-7037\(95\)00236-S](https://doi.org/10.1016/0016-7037(95)00236-S) (1995).
  - 25 Kung, C.-C. & Clayton, R. N. Nitrogen abundances and isotopic compositions in stony meteorites. *Earth and Planetary Science Letters* **38**, 421-435, doi:[https://doi.org/10.1016/0012-821X\(78\)90117-6](https://doi.org/10.1016/0012-821X(78)90117-6) (1978).
  - 26 Sugiura, N., Kiyota, K. & Hashizume, K. Nitrogen components in primitive ordinary chondrites. *Meteorit Planet Sci* **33**, 463-482, doi:10.1111/j.1945-5100.1998.tb01651.x (1998).
  - 27 Gibson, E. K., Moore, C. B. & Lewis, C. F. Total nitrogen and carbon abundances in carbonaceous chondrites. *Geochimica et Cosmochimica Acta* **35**, 599-604, doi:[https://doi.org/10.1016/0016-7037\(71\)90089-5](https://doi.org/10.1016/0016-7037(71)90089-5) (1971).
  - 28 Grady, M. M. & Wright, I. P. Elemental and isotopic abundances of carbon and nitrogen in meteorites. *Space Science Reviews* **106**, 231-248 (2003).
  - 29 Kerridge, J. F. Carbon, hydrogen and nitrogen in carbonaceous chondrites: Abundances and isotopic compositions in bulk samples. *Geochimica et Cosmochimica Acta* **49**, 1707-1714, doi:[https://doi.org/10.1016/0016-7037\(85\)90141-3](https://doi.org/10.1016/0016-7037(85)90141-3) (1985).
  - 30 Pearson, V., Sephton, M., Franchi, I., Gibson, J. & Gilmour, I. Carbon and nitrogen in carbonaceous chondrites: Elemental abundances and stable isotopic compositions. *Meteorit Planet Sci* **41**, 1899-1918 (2006).
  - 31 Robert, F. & Epstein, S. The concentration and isotopic composition of hydrogen, carbon and

- 
- nitrogen in carbonaceous meteorites. *Geochimica et Cosmochimica Acta* **46**, 81-95, doi:[https://doi.org/10.1016/0016-7037\(82\)90293-9](https://doi.org/10.1016/0016-7037(82)90293-9) (1982).
- 32 Sephton, M. A. *et al.* Investigating the variations in carbon and nitrogen isotopes in carbonaceous chondrites. *Geochimica et Cosmochimica Acta* **67**, 2093-2108, doi:[https://doi.org/10.1016/S0016-7037\(02\)01320-0](https://doi.org/10.1016/S0016-7037(02)01320-0) (2003).
- 33 Ivanova, M. A. *et al.* The Isheyev meteorite: Mineralogy, petrology, bulk chemistry, oxygen, nitrogen, carbon isotopic compositions, and  $^{40}\text{Ar}$ - $^{39}\text{Ar}$  ages. *Meteorit Planet Sci* **43**, 915-940, doi:10.1111/j.1945-5100.2008.tb01090.x (2008).
